# Supplementary material for: Building patient capacity to participate in care during hospitalisation: a scoping review
Source: PubMed Central journal article supplement — BMJ Open. 2019 Jul 3;9(7):e026551. doi: 10.1136/bmjopen-2018-026551 (PMC6615828; doi:10.1136/bmjopen-2018-026551), 2019-07-03
Supplement: bmjopen-2018-026551supp002.pdf [file bmjopen-2018-026551supp002.pdf]

## Supplementary File 2. Scoping Review Data Extraction Sheet

|                                                              |                                    |  |
|--------------------------------------------------------------|------------------------------------|--|
| Primary author/organization:                                 |                                    |  |
| Title of article:                                            |                                    |  |
| Source of publication (Name of journal or report):           |                                    |  |
| Year of publication:                                         |                                    |  |
| Reviewer initials:                                           |                                    |  |
| Country                                                      |                                    |  |
| Overall Aim and Purpose of the Study                         |                                    |  |
| Focus of Patient Engagement Program                          |                                    |  |
| Describe the Intervention                                    |                                    |  |
| Duration of Program                                          |                                    |  |
| Theoretical Framework<br>(Identify and describe, if present) |                                    |  |
| Study Design<br>(Quantitative)                               | Case Series                        |  |
|                                                              | Cross-Sectional<br>(Pre- and post) |  |
|                                                              | Case-control                       |  |
|                                                              | Retrospective<br>Cohort            |  |
|                                                              | Prospective<br>Cohort              |  |
|                                                              | RCT                                |  |
|                                                              | Other                              |  |
| Study Design<br>(Qualitative)                                | Basic Interpretive                 |  |
|                                                              | Phenomenological                   |  |
|                                                              | Grounded Theory                    |  |
|                                                              | Ethnographic                       |  |
|                                                              | Case Study                         |  |
|                                                              | Other                              |  |
| Study Design (Mixed<br>Methods)                              | QUAL core<br>QUAN core<br>Sequence |  |
|                                                              | Instruments Used                   |  |

|                       |                                        |                                                    |
|-----------------------|----------------------------------------|----------------------------------------------------|
| Non-Research Document | Describe type                          |                                                    |
| Type of Hospital      | Teaching                               |                                                    |
|                       | Community                              |                                                    |
|                       | Rehabilitation                         |                                                    |
|                       | Psychiatric/Mental Health              |                                                    |
|                       | Other                                  |                                                    |
| Type of Unit          |                                        |                                                    |
| Participants          | Number of participants                 |                                                    |
|                       | Type of Participants                   | Patient    Family Member    Care Provider    Other |
|                       | Medical diagnoses                      |                                                    |
|                       | Age range                              |                                                    |
|                       | Sex (%)                                |                                                    |
|                       | Inclusion criteria                     |                                                    |
|                       | Exclusion criteria                     |                                                    |
| Results               | Patient outcomes                       |                                                    |
|                       | Health care provider outcomes          |                                                    |
|                       | Health system & effectiveness outcomes |                                                    |
|                       | Funder outcomes                        |                                                    |
| Comments              |                                        |                                                    |
